# Supplementary material for: PHD2 deletion in endothelial or arterial smooth muscle cells reveals vascular cell type-specific responses in pulmonary hypertension and fibrosis
Source: PubMed Central journal article supplement (PMC9054891; doi:10.1007/s10456-021-09828-z), 2022-01-08
Supplement: 10456_2021_9828_MOESM1_ESM.pdf [file 10456_2021_9828_MOESM1_ESM.pdf]

**A**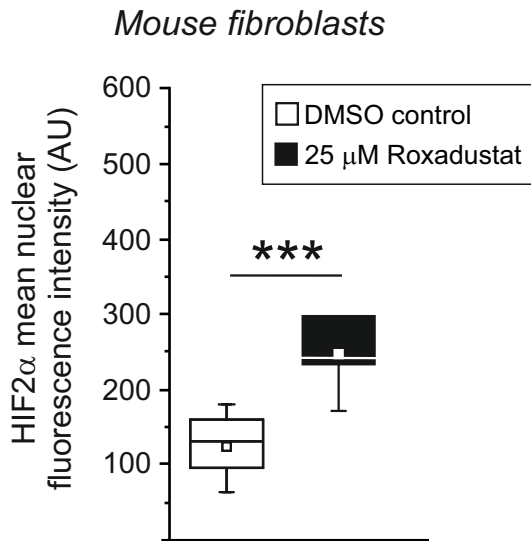**B**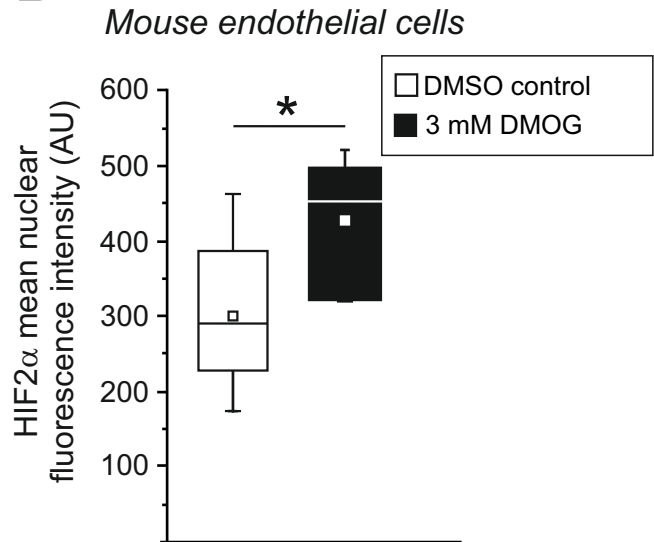

**Supplemental Figure 1. Validation of HIF2 $\alpha$  antibody (#109616, Abcam) for quantitative analysis of nuclear translocation of HIF in mouse cells following the inhibition of PHDs.** HIF2 $\alpha$  mean immunofluorescence intensity in A) mouse NIH3T3 fibroblast and B) mouse primary brain microvascular endothelial cells.  $n = 6$  to 16 replicates, each represent the average of three randomly selected 40x microscopy fields, one field containing 10 to 40 cells. Mean nuclear immunofluorescence intensity was normalized to cytosolic staining and quantified by Fiji. Median (line), average (square), 75th quartile (box), 5th and 95th percentile (whiskers), \*\*\* $P < 0.001$ , \* $P < 0.05$  inhibitor vs. control in  $t$ -test.

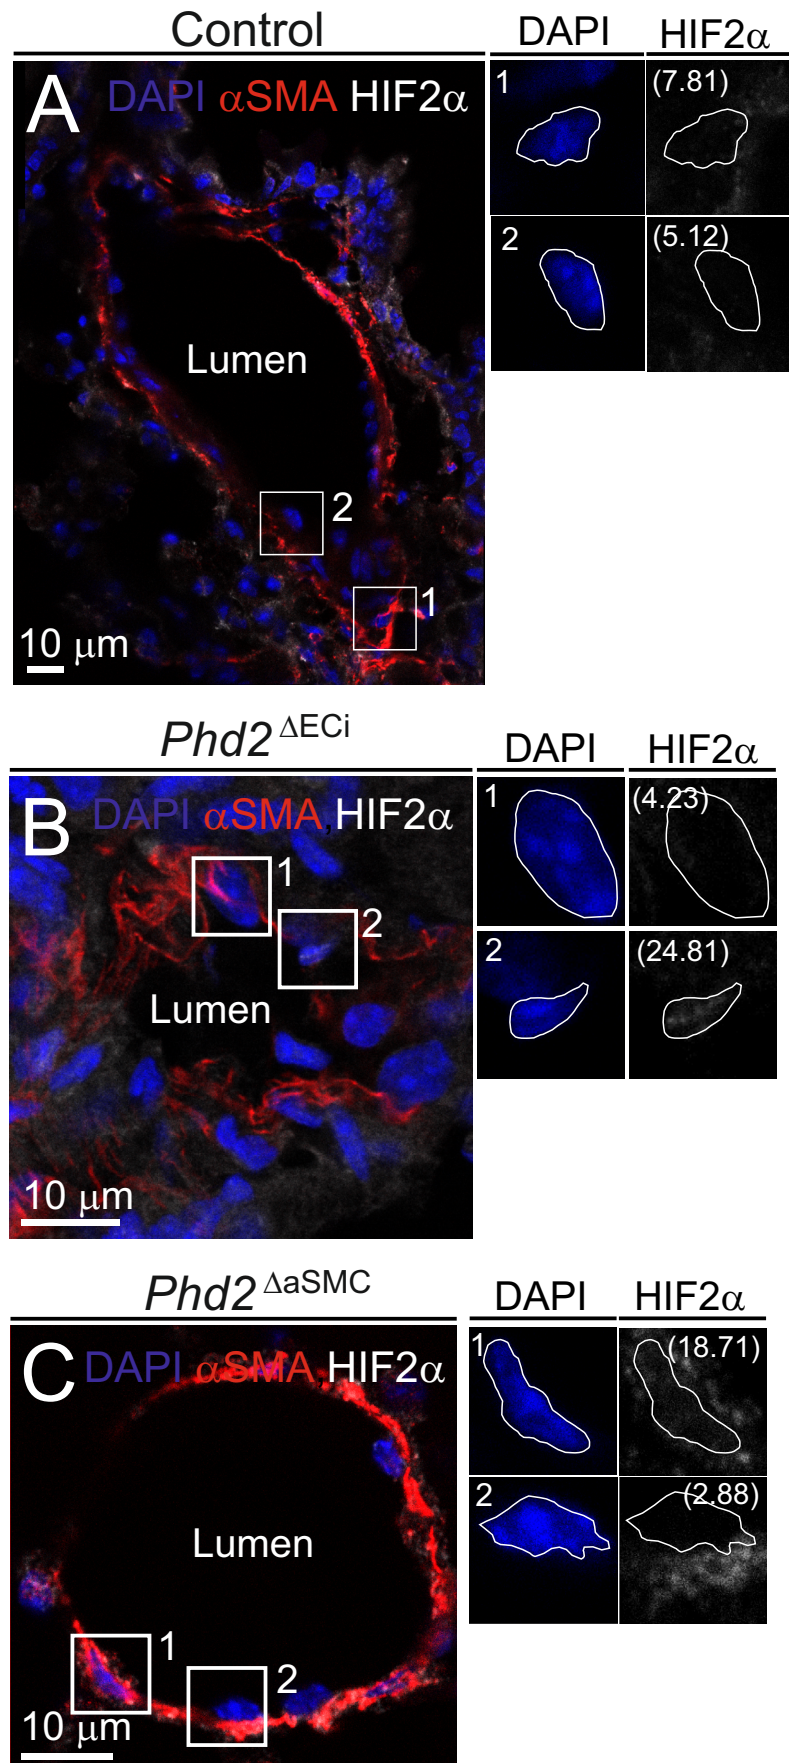

**Supplemental Figure 2.** A-C, pulmonary arteries stained with DAPI (nuclear counterstaining) and antibodies against  $\alpha$ SMA (for aSMCs) and HIF2 $\alpha$  (for stabilization and nuclear translocation of HIF) in arterial SMCs (1) and ECs (2). HIF2 $\alpha$  mean immunofluorescence intensity indicated in the inserts (parenthesis). Image data quantified in Figures 1D and 7B.

*Angpt4*<sup>Cre</sup>; *Rosa26*<sup>mTmG</sup>

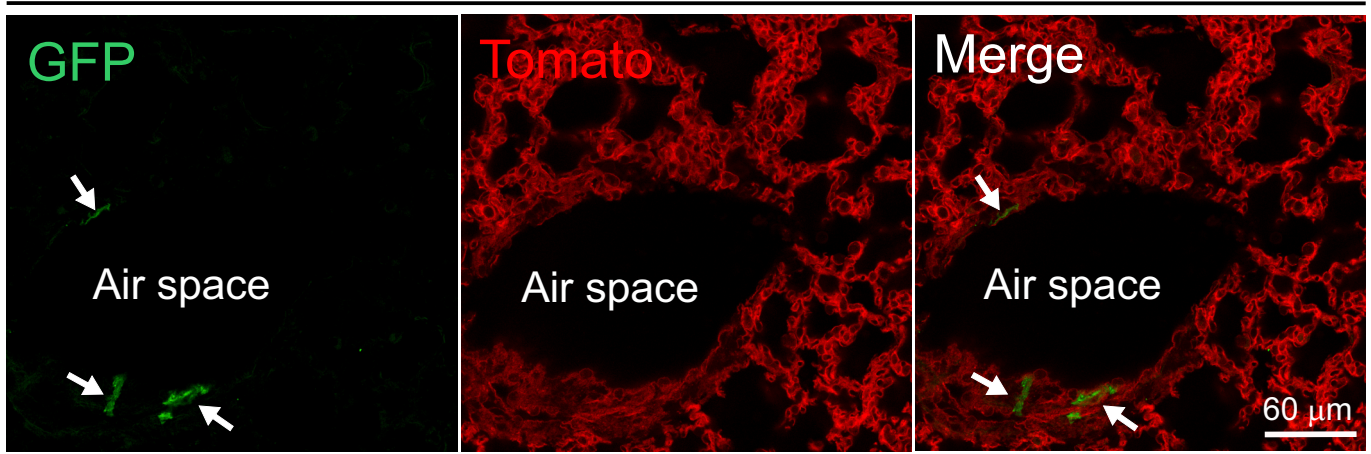

**Supplemental Figure 3.** *Angpt4*<sup>Cre</sup> mice were crossed with *Rosa26*<sup>mT/mG</sup> cell lineage tracing line expressing mTomato prior Cre -induced mGFP expression. In addition to aSMCs, *Angpt4*<sup>Cre</sup> is expressed in same sparse, fibroblast-like cells (arrows) in the lung parenchyma. Sample collected from 10-month-old mouse.

**Supplemental Table I. Primer sequences for RT-PCR**

| <b>Primer</b>       | <b>Source</b> | <b>Sequence</b>             |
|---------------------|---------------|-----------------------------|
| ppET1 Forw          | Mouse         | ACTTCTGCCACCTGGACATC        |
| ppET1 Rev           | Mouse         | GTCTTTCAAGGAACGCTTGG        |
| eNOS Forw           | Mouse         | TGAAGATCTCTGCCTCACTCATG     |
| eNOS Rev            | Mouse         | AGTCTCAGAGCCATACCAGAATGGTT  |
| Col4a1 Forw         | Mouse         | CTGGCACAAAAGGGACGAG         |
| Col4a1 Rev          | Mouse         | ACGTGGCCGAGAATTTCCACC       |
| Col1a1 Forw         | Mouse         | TGACTGGAAGAGCGGAGAGT        |
| Col1a1 Rev          | Mouse         | GTTCGGGCTGATGTACCAGT        |
| FN Forw             | Mouse         | ATCTGGACCCCTCCTGATAGT       |
| FN Rev              | Mouse         | GCCCAGTGATTTTCAGCAAAGG      |
| $\beta$ -actin Forw | Mouse         | TGTTACCAACTGGGACGACA        |
| $\beta$ -actin Rev  | Mouse         | GGGGTGTGTAAGGTCTCAA         |
| CXCL12 Forw         | Mouse         | CCAAGAGTACCTGGAGAAAGC       |
| CXCL12 Rev          | Mouse         | AGTTACAAAGCGCCAGAGCA        |
| Notch3 Forw         | Mouse         | TGAACAACGTGGAGGCTACC        |
| Notch3 Rev          | Mouse         | GCAGCCTGTCCAAGTGATCT        |
| Phd2 Forw           | Mouse         | GGCAAAGCCCAGTTTGCTGACATTG   |
| Phd2 Rev            | Mouse         | TGAGTTCAACCCTCACACCTTTCTCAC |
| COL1A1 Forw         | Human         | GGTTTCGACTTCAGCTTCCTG       |
| COL1A1 Rev          | Human         | TCACCAGTCTCCATGTTGCAG       |
| COL4A1 Forw         | Human         | GTGCAAGGCAATGAACGGGC        |
| COL4A1 Rev          | Human         | GCCTCACACACAGCACACCT        |
| eNOS Forw           | Human         | GCACAG GAAATGTTACCTAC       |
| eNOS Rev            | Human         | CACGATGGTGAC TTTGGCTAG      |
| FN Forw             | Human         | CCTCGAAGAGCAAGAGGCAG        |
| FN Rev              | Human         | GCTTCAGGTTTACTCTCGCA        |
| GAPDH Forw          | Human         | ACAGTCAGCCGCATCTTCTT        |
| GAPDH Rev           | Human         | ACGACCAAATCCGTTGACTC        |
| PHD2 Forw           | Human         | GCACGACACCGGGAAGTT          |
| PHD2 Rev            | Human         | CCAGCTTCCCGTTACAGT          |
| ppET1 Forw          | Human         | TATCAGCAGTTAGTGAGAGG        |
| ppET1 Rev           | Human         | CGAAGGTCTGTCACCAATGTGC      |
